# Supplementary material
Source: publisher site journal article supplement (https://www.dovepress.com/article/292490)
Supplement: Supplementary file 1 [file get_supplementary_file.php]

# Supporting files

**Labels of supporting files:**

- Supporting file 1: Stimulus materials (pictures and words)
- Supporting file 2: Apparatus of the study
- Supporting file 3: Details on the cognitive tasks

References of all supporting files are included at the end of the document.

### S1: Stimulus materials (pictures and words)

### **Procedure for the picture selection**

Regarding addiction-related pictures, a preliminary study (unpublished work) was conducted with patients presenting with a BA and controls recruited through the network of the research team without BA (54 patients and 53 controls). For each type of addiction (gambling disorder (GbD), gaming disorder (GmD), sexual addiction (SA) and food addiction (FA)), a preselection of 60 addiction-related pictures and 30 neutral pictures (used only as distractors) in “Google Images” was conducted. The participants rated each picture for the emotional valence and arousal using the SAM scale (Self-Assessment Manikin, a Likert scale with nine levels [1]), as well as the level of connection with addiction using a 9-point Likert scale.

Pictures with a low level of connection with addiction (score < 5) were removed from the picture set. Then, the pictures were ranked according to their connection with addiction, their arousal, and their valence, in this order. Finally, for each addiction, the ranked pictures were sorted depending on the preferred modality of the addiction depicted in it (see Table 4 for a detail of available modalities for each addiction). In the end, the picture set included the six pictures most related to addiction for each modality to be able to present twelve different pictures related to addiction for each task in the BANCO and BANCO2 studies. Indeed, the participants have to choose two modalities that reflect his/her preferences. The only exception is for FA with which the participant has to choose only one modality. As a consequence, the picture set is composed of twelve pictures of salted food, twelve pictures of sugar food, or a mix of six of each (twelve in sum) for the combined modality.

Each addiction-related picture is paired with a positive, a negative, and two neutral pictures. Neutral, positive, and negative pictures come from the IAPS database (International Affective Picture System) [2]. Positive and negative pictures are defined by a valence ranging from 6 to 9 and from 1 to 4, respectively, while neutral pictures correspond to pictures with a valence ranging from 4 to 6. For the positive pictures, those with the highest valence and with high arousal (>4) are favoured. For negative pictures, those with the lowest valence and with high arousal (>4) were favoured. Finally, for neutral pictures, those with the lowest arousal and the valence closest to 5 were favoured (see Additional Table 1 for characteristics). Neutral, positive, and negative pictures that included an element that can be related to addiction were excluded (e.g., for gambling: all pictures with horses, sports, or money). These pictures were matched with the addiction-related pictures based on the presence of faces, hands, animals, and actions and the global composition of the picture.

Additional Table 1 Arousal and valence of picture stimuli

|  | **Addiction stimuli** | | **Neutral stimuli** | | **Positive stimuli** | | **Negative stimuli** | |
| --- | --- | --- | --- | --- | --- | --- | --- | --- |
|  | **Valence** | **Arousal** | **Valence** | **Arousal** | **Valence** | **Arousal** | **Valence** | **Arousal** |
|  | Mean | Mean | Mean | Mean | Mean | Mean | Mean | Mean |
|  | *Min-Max* | *Min-Max* | *Min-Max* | *Min-Max* | *Min-Max* | *Min-Max* | *Min-Max* | *Min-Max* |
| **GbD** | 4,87 | 4,52 | 5,08 | 3,02 | 7,32 | 5,15 | 2,56 | 6,15 |
| *2,29 - 6,17* | *3,00 - 6,96* | *4,06 - 5,8* | *1,05 - 3,95* | *6,32 - 8,03* | *4,28 - 6,28* | *1,66 - 3,49* | *4,57 - 7,35* |
| **GmD** | 5,88 | 5,48 | 5,15 | 3,34 | 6,67 | 5,59 | 2,23 | 6,15 |
| *3,60 - 7,00* | *4,00 - 6,33* | *4,06 - 5,92* | *2,93 - 3,99* | *6,02 - 8,03* | *4,08 - 6,99* | *1,62 - 2,73* | *5 - 7,29* |
| **SA** | 5,33 | 4,52 | 4,92 | 3,88 | 6,78 | 5,24 | 2,16 | 6 |
| *2,56-7,24* | *1,81 - 6,69* | *3,26 - 5,92* | *2,41 - 5,72* | *6,11 - 7,74* | *4,06 - 6,99* | *1,80 - 2,73* | *4,00 - 6,99* |
| **FA** | 5,34 | 6,1 | 4,88 | 3,4 | 7,13 | 4,92 | 2,54 | 5,61 |
| *3,70 - 6,30* | *4,60 - 6,96* | *4 - 5,99* | *1,72 - 4,88* | *6,05 - 8,03* | *3,57 - 6,44* | *1,62 - 2,96* | *4,26 - 7,15* |

### **Procedure for the word selection**

A first survey was disseminated across the professional and personal networks of the research team members to identify addiction-related words. A first list of 90 addiction-related words was constituted for each BA and was presented for rating during the initial picture rating. Addiction-related words were rated and selected using the same procedure as with the pictures. A neutral, a positive and a negative word were paired with each addiction-related word. Neutral, positive, and negative words came from the FAN database [3,4] and Bonin’s database [5], although most of the words came from the FAN database. Indeed, Bonin’s database was only used for longer words (which were especially present for SA) because the FAN database lacked such long words (9 to 13 thirteen letters and one word of 4 letters because a matching negative word was lacking). As no information about their arousal was available in Bonin’s database and because valence was rated on a 5-point scale, the characteristics of these words were not included in the Additional Table 2. The same procedure used with the pictures was used for matching with the addiction-related words (see Additional Table 2 for numbers), except that words were also matched depending on their characteristics (number of letters, syllables, and phonemes).

Additional Table 2 Arousal and valence of words stimuli

|  | **Addiction stimuli** | | **Neutral stimuli** | | **Positive stimuli** | | **Negative stimuli** | |
| --- | --- | --- | --- | --- | --- | --- | --- | --- |
|  | **Valence** | **Arousal** | **Valence** | **Arousal** | **Valence** | **Arousal** | **Valence** | **Arousal** |
|  | Mean | Mean | Mean | Mean | Mean | Mean | Mean | Mean |
|  | *Min-Max* | *Min-Max* | *Min-Max* | *Min-Max* | *Min-Max* | *Min-Max* | *Min-Max* | *Min-Max* |
| **GbD** | 5,02 | 5,01 | 4,94 | 2,85 | 7,53 | 5,74 | 2,30 | 5,66 |
| *3,5 – 7,13* | *2,42 – 7,58* | *4,35 – 5,46* | *2,3 – 3,4* | *6,84 – 8,43* | *4,32 – 7,86* | *1,36 – 3,32* | *4,24 – 7,44* |
| **GmD** | 5,67 | 4,94 | 5,02 | 3,22 | 7,52 | 5,67 | 2,68 | 5,48 |
| *4,33 – 7,75* | *3,98 – 6,25* | *4,38 – 5,81* | *2,47 – 3,9* | *6,03 – 8,58* | *4,04 – 7,5* | *1,35 – 3,59* | *7,16 – 4,19* |
| **SA** | 5,28 | 4,77 | 4,9 | 3,54 | 7,2 | 5,57 | 2,26 | 5,82 |
| *2,88 – 7,66* | *2,5 – 6,71* | *4,08 – 5,62* | *2,47 – 3,92* | *6,13 – 8,58* | *4,04 – 7,5* | *1,35 – 3,65* | *4,28 – 7,44* |
| **FA** | 5,33 | 6,02 | 4,93 | 3,22 | 7,29 | 5,25 | 2 ,29 | 6,12 |
| *1,6 – 7,25* | *4,04 – 7,4* | *4,08 – 5,59* | *2,35 – 3,89* | *6,13 – 8,43* | *4,04 – 7,19* | *1,36 – 3,43* | *4,47 – 7,44* |

### S2: Apparatus of the study

Computerized cognitive tasks are programmed and presented using SuperLab Pro 5 (Cedrus Corporation, San Pedro, CA, USA). A PC desktop computer displays the tasks (64 bits, 3.50 GHz processor). The participants are seated with their eyes 60 cm from the computer. The SV-1 voice detection device (Cedrus Corporation) records vocal responses during the Stroop task. The participants use the 7-button response pad RB-730 (Cedrus Corporation) for go-nogo, stop signal, Stroop, visual dot probe, and single key impulsivity paradigm tasks.

During two tasks (Iowa gambling task and cue-reactivity task), various transducersrecord **psychophysiological responses**: A GSR amplifier (galvanic skin response) measures skin conductance levels using two sensors maintained by Velcro tape on the first phalanx of the forefinger and middle finger of the non-dominant hand (AdInstruments, Oxford, UK). A Trigno wireless ECG (electrocardiogram) sensor connected with two disposable electrodes, positioned in a bipolar configuration on the front of the two clavicles, measures inter-beat heart intervals (Delsys, Natick, MA, USA). A Trigno EMG (electromyogram) wireless system connected with miniature (25/12/7 mm) wireless surface EMG sensors positioned using specific adhesive skin interfaces measures the electrical activity of the *zygomaticus major* and the *corrugator supercilii* muscles (Delsys). Signals from the transducers are amplified and filtered using a 16-channel amplifier (PowerLab 16/35P, AdInstruments).

The StimTracker ST-100 (Cedrus Corporation) synchronizes the psychophysiological measurement system (Powerlab) and events from computerized cognitive tasks (SuperLab). Signals are digitalized at a 1000 Hz maximum sampling rate and then recorded, displayed, and analysed on a laboratory computer with LabChart 8 Pro software (AdInstruments).

### S3: Details on the cognitive tasks

d²

Fourteen lines constitute the test. The participants have 20 seconds to process each line and find as many targets as possible. The number of items processed (GZ) reflects processing speed. The percentage of errors (the number of errors divided by the number of items processed) on the test expresses the accuracy of the participant’s responses. Finally, subtracting the number of “good hits” minus errors of commission (distractors marked) provides the concentration performance component (KL). This score reflects the processing speed corrected by accuracy.

Stroop task

All words are displayed on the screen and written in upper-case letters. Each block is composed of a practice with eight trials followed by 24 trials. *In the first two conditions* (denomination and reading), each word/colour appears six times (4 different colours). *In the third condition* (interference), each word appears twice with the same incongruent colour. *In the emotional condition,* words appear by blocks of 8 words of the same valence to prevent carry-over effects (i.e., a speed reduction based on reaction time during the trial following a trial presenting emotional stimuli [6–11]. For each valence, there are three blocks, with a pseudo-randomization that avoided two blocks of the same type following each other (8 words per block and four types of block displayed three times=24 words for each type and 96 trials in sum). Participant RTs are recorded with a voice detection device, while the experimenter presses colour buttons corresponding to the participant’s response. This modality of response permits avoidance of the diminution of the interference effect inherent to the motor response modality [12,13].

Visual dot probe task (VDP)

The participants keep their fingers above the left and right button of the response box and look at a central fixation cross during the whole task. Six practice trials are presented at the beginning of the task and are composed of neutral pictures that are not used in the subsequent trials. Pairs of pictures (350 x 350 pixels) appear after 500 ms on both sides of the central fixation cross and remain on the screen for 250 ms. The fixation cross remains on the screen as well to prevent eye movements, based on Petrova, Wentura, and Bermeitinger's (2013) recommendation. Then, a target (a black dot) appears in the position of one of the pictures until the response of the participant or a 2000-ms maximum (see Additional Figure 1a). The participant has to press the left or right button of the response box, corresponding to the position of the target, as quickly as possible. This detection model was chosen instead of a discrimination model to assess low levels of detection and not higher cognitive processes that discrimination modality requires [15]. For each trial, one of the pictures is neutral, while the other is its matched picture and can be neutral, negative, positive, or addiction-related. There are twelve different pictures of each valence type (neutral, positive, negative, addiction-related) with four presentations of each: two times in a congruent trial (target is on the same side as the matched stimuli) and two times in a non-congruent trial (target is on the opposite side as the matched stimuli). The paired pictures are grouped by valence type and presented in blocks of 12 trials to avoid valence-related carry-over effects. The order of presentation is randomized inside the blocks. The order of block presentation is pseudo-randomized so as not present the same type of block twice in a row to avoid habituation, and the pseudo-randomization is counterbalanced to control for any effect linked to the order of testing. Sixteen blocks are thus presented (4 blocks of each type, 12 trials per block, 192 trials in sum) with four breaks allowing the patient to rest. The inter-trial interval fluctuates between 250, 500, or 750 ms. The computer records (i) reaction time (RT), (ii) choice of the participant (left or right), (iii) type of trial (neutral-neutral, positive-neutral, negative-neutral, addiction related-neutral), and (iv) the congruence of the trial (if the target is on the same side of the cued picture or not). Subtracting mean RTs between congruent and non-congruent emotional trials gives the *attentional bias score*. A positive score highlights the presence of a bias towards the emotional stimuli, with faster reaction times when the probe is cued by the emotional stimuli. In contrast, a negative score highlights the presence of a bias away from the emotional stimuli (avoidance), with slower reaction times when the probe is cued by the emotional stimuli. When there is no imbalance between the allocation of attention, the value of the attentional bias score is zero [16]. The presence of an attentional bias can be due either to an attraction towards the stimuli or to difficulty disengaging from it. Distinguishing attraction from difficulty to disengagement can be made by comparing neutral-neutral trials with emotional-neutral trials. In the case of an attraction towards emotional stimuli, the RTs should be faster in congruent emotional trials than in neutral trials. In the case of difficulties in disengaging attention of emotional stimuli, RTs should be slower in non-congruent emotional trials than neutral trials [15,17].

Iowa gambling task (IGT)

Decks C and D include lower gains (+50 points) and frequent (deck C) or less frequent (deck D) low penalties (-250 points each 10 cards). These decks result in a global positive balance between gain and penalties and are thus considered advantageous decks. In contrast, decks A and B include higher gains (+100 points) but frequent (deck A) or rare (deck B) high penalties (including a loss of 1250 points each 10 cards). As a consequence, they result in a final net loss and are considered disadvantageous decks. The more profitable strategy is to privilege long-term rewards, i.e., the advantageous decks [18]. The participants have 2000€ of fictional money and are instructed to play as if it was their real money and to earn as much money as possible. They know neither which decks are advantageous nor when the task ends. At the end of the task, they are asked to judge which decks were advantageous and which were not (conceptual knowledge). The program records, for each trial, the RT, the deck chosen, and the money earned. Heart inter-beat intervals and electrodermal activity are also recorded 4 seconds before and 4 seconds after the decision [19] to obtain data regarding physiological information provided by the autonomous nervous system in a situation of uncertainty.

Verbal fluencies

Outcomes are the number of correct responses and types of errors and the number of switches and clusters. Indeed, according to Troyer, Moscovitch, and Winocur (1997), quantitative analysis can be completed by qualitative analysis in which clustering corresponds to the grouping of words that come from the same semantic category (in the lexical modality) or with common phonemic properties (same two first letters for example) (in the phonological modality), while switching corresponds to going from one subcategory to another [20,21].

Trail making test (TMT)

Outcomes on this task are time taken to complete both sheets and numbers and types of errors. The difference between the two conditions permits us to observe the cost of alternating, which represents the capacities of reactive flexibility.

M-CST (modified card sorting test)

During this task, the participants have to match the cards from the deck to the stimulus cards. They have to determine by themselves the correct matching rule from among three possible rules (number, colour, and shape), which are not told to the participant. After six consecutive correct answers, the category is considered completed, and the rule changes. After a first successful series of trials using consecutively the three possible rules (in the order decided by the participant), rules are repeated in the same order as previously, without the participant being aware. The number of cards used before for completing the six categories, the number of categories completed, the number of errors and perseverative errors (an error is perseverative when the answer uses the same rule as the previous trial while the experimenter qualified this previous answer as wrong) are recorded. We also added the “categorizing efficiency”: this score is obtained by multiplying the number of categories completed by the number of cards by categories; the number of cards not used is then added. This score permits us to capture more subtle cognitive alterations than the traditional M-CST performance parameters, as we expected our sample will not present with severe cognitive deficits [22].

Tower of Hanoï

Points are attributed depending on the number of moves used and if the participant finishes before the time limit (from 30 to 240 seconds). The time before the first move and the total time of realization, the number of moves and errors, and the number of points are recorded. These different measures permit us to characterize performance between groups (number of points) but also to compare whether the pattern of realization is the same between groups (for example, time before the first move illustrates impulsivity in realization).

Go-nogo task

For each trial, a fixation cross stays on the screen for 500 ms. Then, a neutral or a related-addiction picture appears, with either a square (go trials) or a circle (nogo trials) at its centre (Additional Figure 1b; shapes are surrounded by black and white outlines to clearly distinguish them from the picture). The participants are instructed to press the button as fast as possible on go trials (squares) and to refrain from pressing on nogo trials (circles). Eighty percent of the stimuli indicated go trials (4 blocks of 60 trials: 48 go trials including 24 neutral pictures and 24 addiction-related pictures + 12 nogo trials with six neutral and six addiction-related pictures). Before the presentation of trials, a practice block using neutral stimuli not used during the test phase was conducted. This practice block includes 32 trials with 50% go trials and is used to habituate and stimulate the automatic association between stimuli and behaviour [23]. The ITI after the presentation of the target varies between 500, 1000, or 1500 ms to avoid the generation of an anticipated motor response because of a regular temporality of the press [24]. The number and types of errors, successes and RTs per type of stimuli are measured.

Single key impulsivity paradigm (SKIP)

The participants received the standardized instructions as proposed by Dougherty *et al*. [25] so that they know that the longer time that they wait between presses, the more points they would obtain. After each press, the cumulative number of points obtained appears at the top of the screen, and the number of points they obtained on the previous trial appears at the bottom of the screen. Regarding the attribution of points, the calculation is exponential and obtained with this formula (RT = time since the last press in seconds): [RT + (3 x RT²)] / 100. This formula is slightly different from the original task, with a division by 100 and not 1000, which allows a more rapid increase in points. The program records the mean duration between presses, the maximum wait between two presses, and the number of presses.

Stop Signal Task (SST)

For this emotional task [8,26], each trial begins with a fixation cross that remains on the screen for 500 ms. Then, a picture is displayed in the centre of the screen (350 x 350 pixels), with an arrow at its centre (the direction can be either right or left, black and white outlines surround arrows to distinguish them from the picture). Those pictures can be either neutral or related to addiction (12 pictures for each). On 25% of the trials, a STOP signal is emitted as a sound for 1 second (5 blocks of 64 trials = 320 trials in sum, 64 STOP trials). The pictures stay on the screen for 1500 ms, and ITI is 1000 ms (see Additional Figure 1c).

Subjects must fixate on the fixation cross and press the button corresponding to the direction of the arrow on the screen. Arrows were chosen instead of crosses and circles to avoid the difficulty of memorizing the association with the correct response [27,28]. When the STOP signal occurs, they have to refrain from pressing the button and wait for the next trial. The participants are advised that trial difficulty increases because the software adapts itself to their performance. Actually, the stop-signal delay (SSD; delay between the appearance of the picture and the STOP signal in STOP trials) varies between 0 and 1500 ms according to the staircase algorithm [29]. Indeed, for each correct response to a STOP trial, the SSD increases by 25 ms, while for each wrong response, it decreases by 25 ms. The experiment begins with a practice of 32 trials (8 STOP and 24 GO with neutral pictures), without the alterations in delay that depend on responses. At the end of each block, a break is offered, and feedback (number of correct responses) appears on the screen. The SSRT (stop signal reaction time) is then calculated with the integration method by blocks to avoid bias in the calculation of the SSRT in case of strategic slowing of responses as the task progresses [30]. To compensate for missing values, omissions (non-response to GO trials) were replaced by maximum RT obtained during GO trials [31].


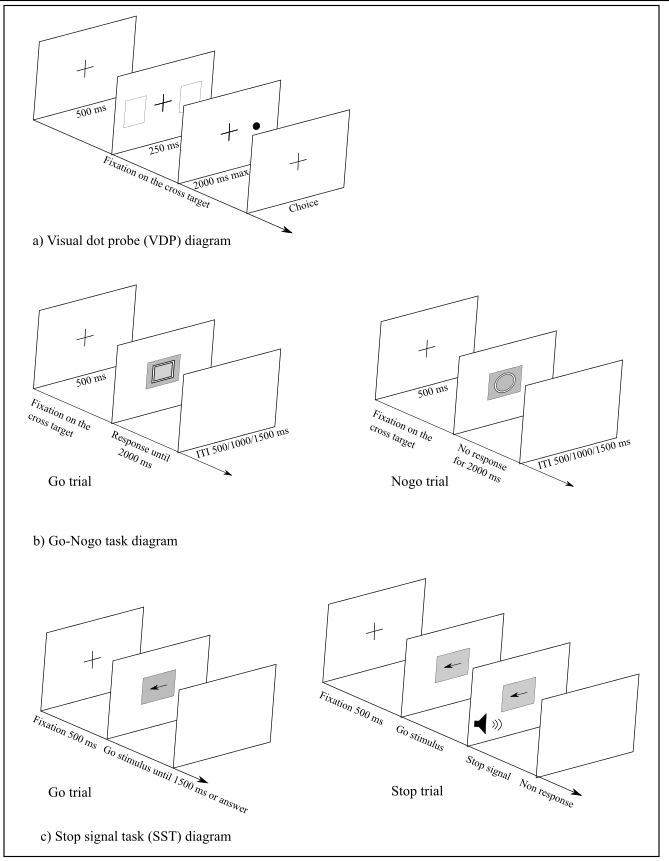


Additional Figure 1 Diagram of computerized tasks

# References of supporting files

1. Bradley MM, Lang PJ. Measuring emotion : The self-assessment Manikin and the semantic differential. J Behav Ther Exp Psychiatry. 1994;25: 49–59. doi:OCO-7916/94 $7.00 + 0.00

2. Lang PJ, Bradley MM, Cuthbert BN. International affective picture system (IAPS): affective ratings of pictures and instruction manual. Technical report A-8. Gainesville, Fla.: NIMH, Center for the Study of Emotion & Attention; 2008.

3. Monnier C, Syssau A. Affective norms for french words (FAN). Behav Res. 2014;46: 1128–1137. doi:10.3758/s13428-013-0431-1

4. Syssau A, Font N. Evaluations des caractéristiques émotionneles d’un corpus de 604 mots. Bulletin de psychologie. 2005;3: 361–367. doi:10.3917/bupsy.477.0361

5. Bonin P, Méot A, Aubert L, Malardier N, Niedenthal P. Normes de concrétude, de valeur d’imagerie, de fréquence subjective et de valence émotionnelle pour 866 mots. 2003; 42.

6. Robbins S, Ehrman R. The role of attentional bias in substance abuse. Behav Cogn Neurosci Rev. 2005;3: 243–260. doi:10.1177/1534582305275423

7. Dresler T, Mériau K, Heekeren HR, van der Meer E. Emotional Stroop task: effect of word arousal and subject anxiety on emotional interference. Psychol Res. 2009;73: 364–371. doi:10.1007/s00426-008-0154-6

8. Lorains FK, Stout JC, Bradshaw JL, Dowling NA, Enticott PG. Self-reported impulsivity and inhibitory control in problem gamblers. J Clin Exp Neuropsychol. 2014;36: 144–157. doi:10.1080/13803395.2013.873773

9. Waters AJ, Sayette MA, Wertz JM. Carry-over effects can modulate emotional Stroop effects. Cognition and Emotion. 2003;17: 501–509. doi:10.1080/02699930143000716

10. Hudson A, Jacques S, Stewart SH. Selective Attention to Emotional Pictures as a Function of Gambling Motives in Problem and Nonproblem Gamblers. Psychol Addict Behav. 2013; 14. doi:10.1037/a0031863

11. Bar-Haim Y, Lamy D, Pergamin L, Bakermans-Kranenburg MJ, van IJzendoorn MH. Threat-related attentional bias in anxious and nonanxious individuals: a meta-analytic study. Psychol Bull. 2007;133: 1–24. doi:10.1037/0033-2909.133.1.1

12. MacLeod CM. Haifa Century of Research on the Stroop Effect: An Integrative Review. Psychol Bull. 1991;109: 163–203. doi:0033-2909/91/$3.00

13. Penner I-K, Kobel M, Stöcklin M, Weber P, Opwis K, Calabrese P. The Stroop Task: Comparison Between the Original Paradigm and Computerized Versions in Children and Adults. Clin Neuropsychol. 2012; 1–12. doi:10.1080/13854046.2012.713513

14. Petrova K, Wentura D, Bermeitinger C. What Happens during the Stimulus Onset Asynchrony in the Dot-Probe Task? Exploring the Role of Eye Movements in the Assessment of Attentional Biases. Allen P, editor. PLoS ONE. 2013;8: e76335. doi:10.1371/journal.pone.0076335

15. van Rooijen R, Ploeger A, Kret ME. The dot-probe task to measure emotional attention: A suitable measure in comparative studies? Psychon Bull Rev. 2017;24: 1686–1717. doi:10.3758/s13423-016-1224-1

16. MacLeod C, Mathews A, Tata P. Attentional bias in emotional disorders. J Abnorm Psychol. 1986;95: 15–20. doi:10.1037/0021-843X.95.1.15

17. Koster EHW, Crombez G, Verschuere B, De Houwer J. Selective attention to threat in the dot probe paradigm: differentiating vigilance and difficulty to disengage. Behav Res Ther. 2004;42: 1183–1192. doi:10.1016/j.brat.2003.08.001

18. Kovács I, Richman MJ, Janka Z, Maraz A, Andó B. Decision making measured by the Iowa Gambling Task in alcohol use disorder and gambling disorder: a systematic review and meta-analysis. Drug Alcohol Depend. 2017;181: 152–161. doi:10.1016/j.drugalcdep.2017.09.023

19. Goudriaan AE, Oosterlaan J, De Beurs E, Van den Brink W. Psychophysiological determinants and concomitants of deficient decision making in pathological gamblers. Drug Alcohol Depend. 2006;84: 231–239. doi:http://dx.doi.org/10.1016/j.drugalcdep.2006.02.007

20. Troyer AK, Moscovitch M, Winocur G. Clustering and switching as two components of verbal fluency: evidence from younger and older healthy adults. Neuropsychology. 1997;11: 138–146.

21. Gierski F, Ergis A-M. Les fluences verbales : aspects théoriques et nouvelles approches. psy. 2004;104: 331–359. doi:10.3406/psy.2004.29670

22. Cianchetti C, Corona S, Foscoliano M, Scalas F, Sannio-Fancello G. Modified Wisconsin Card Sorting Test: proposal of a supplementary scoring method. Arch Clin Neuropsychol. 2005;20: 555–558. doi:10.1016/j.acn.2004.12.002

23. Deleuze J, Nuyens F, Rochat L, Rothen S, Maurage P, Billieux J. Established risk factors for addiction fail to discriminate between healthy gamers and gamers endorsing DSM-5 Internet gaming disorder. J Behav Addict. 2017;6: 516–524. doi:10.1556/2006.6.2017.074

24. Schulz K, Fan J, Magidina O, Marks D, Hahn B, Halperin J. Does the emotional go/no-go task really measure behavioral inhibition?Convergence with measures on a non-emotional analog. Arch Clin Neuropsychol. 2007;22: 151–160. doi:10.1016/j.acn.2006.12.001

25. Dougherty DM, Marsh-Richard DM, Hatzis ES, Nouvion SO, Mathias CW. A Test of Alcohol Dose Effects on Multiple Behavioral Measures of Impulsivity. Drug Alcohol Depend. 2008;96: 18. doi:0.1016/j.drugalcdep.2008.02.002

26. Logan GD, Cowan WB. On the Ability to Inhibit Thought and Action: A Theory of an Act of Control. : 33.

27. Grant JE, Odlaug BL, Chamberlain SR, Schreiber LRN. Neurocognitive Dysfunction in Strategic and Non-Strategic Gamblers. Prog Neuropsychopharmacol Biol Psychiatry. 2012;38: 336–340. doi:10.1016/j.pnpbp.2012.05.006

28. Odlaug BL, Chamberlain SR, Kim SW, Schreiber L, Grant JE. A neurocognitive comparison of cognitive flexibility and response inhibition in gamblers with varying degrees of clinical severity. Psychol Med. 2011;41: 2111–2119. doi:10.1017/S0033291711000316

29. Verbruggen F, Logan GD. Response inhibition in the stop-signal paradigm. Trends Cogn Sci. 2008;12: 418–24.

30. Verbruggen F, Chambers CD, Logan GD. Fictitious Inhibitory Differences: How Skewness and Slowing Distort the Estimation of Stopping Latencies. Psychol Sci. 2013;24: 352–362. doi:10.1177/0956797612457390

31. Verbruggen F, Aron AR, Band G, Beste C, Bissett P, Brockett AT, et al. A consensus guide to capturing the ability to inhibit actions and impulsive behaviors in the stop-signal task. 2019 [cited 7 Aug 2019]. doi:10.31219/osf.io/8mzdu
